# Supplementary material for: Prevalence and distribution of peripheral musculoskeletal manifestations in spondyloarthritis including psoriatic arthritis: results of the worldwide, cross-sectional ASAS-PerSpA study
Source: HighWire-hosted journal article supplement (doi:10.1136/rmdopen-2020-001450), 2021-01-01
Supplement: rmdopen-2020-001450supp001_data_supplement.pdf [file rmdopen-2020-001450supp001_data_supplement.pdf]

**Prevalence and distribution of peripheral musculoskeletal manifestations in spondyloarthritis including psoriatic arthritis: results of the worldwide, cross-sectional ASAS-PerSpA study.**

**SUPPLEMENTARY MATERIAL**

**Supplementary Table S1. Final number of patients per country and per region.**

| Country     | Number of patients<br>N = 4465 | Region                       | Number of patients |
|-------------|--------------------------------|------------------------------|--------------------|
| Argentina   | 214                            | Latin America                | 538 (12.0%)        |
| Chile       | 68                             |                              |                    |
| Mexico      | 217                            |                              |                    |
| Colombia    | 39                             |                              |                    |
| France      | 305                            | Europe and North America     | 1677 (37.6%)       |
| Spain       | 208                            |                              |                    |
| Germany     | 302                            |                              |                    |
| Netherlands | 129                            |                              |                    |
| Romania     | 132                            |                              |                    |
| Portugal    | 191                            |                              |                    |
| Hungary     | 100                            |                              |                    |
| Italy       | 200                            |                              |                    |
| US          | 98                             |                              |                    |
| Canada      | 12                             |                              |                    |
| UK          | 0                              |                              |                    |
| India       | 209                            | Asia                         | 975 (21.8%)        |
| Japan       | 197                            |                              |                    |
| China       | 167                            |                              |                    |
| Taiwan      | 202                            |                              |                    |
| South Korea | 200                            |                              |                    |
| Egypt       | 288                            | Middle East and North Africa | 1275 (28.6%)       |
| Morocco     | 285                            |                              |                    |
| Lebanon     | 213                            |                              |                    |
| Turkey      | 489                            |                              |                    |

Supplementary Table S2. Socio-demographics and clinical characteristics, disease activity and disease burden with regard to the geographic area.

|                                                     | Latin America<br>N = 538 | Europe and North<br>America<br>N = 1677 | Asia<br>N = 975 | Middle East and North<br>Africa<br>N = 1275 |
|-----------------------------------------------------|--------------------------|-----------------------------------------|-----------------|---------------------------------------------|
| Age, mean (SD)                                      | 46.2 (13.8)              | 47.7 (13.6)                             | 40.7 (14.7)     | 42.3 (12.8)                                 |
| Gender (men)                                        | 61.7%                    | 58.7%                                   | 72.2%           | 55.2%                                       |
| BMI (Kg/m <sup>2</sup> ), mean (SD)                 | 27.2 (4.9)               | 27.0 (5.7)                              | 23.8 (4.5)      | 27.0 (5.3)                                  |
| Ever smoker                                         | 38.8%                    | 911/1673 (54.5%)                        | 35.1%           | 34.4%                                       |
| Ever alcohol                                        | 44.2%                    | 875/1674 (52.3%)                        | 44.4%           | 20.9%                                       |
| University education                                | 217/537 (40.4%)          | 600/1674 (35.8%)                        | 55.3%           | 36.0%                                       |
| Fibromyalgia (rheumatologist's opinion)             | 29/537 (5.4%)            | 159/1676 (9.5%)                         | 1.8%            | 15.2%                                       |
| Fibromyalgia (FiRST)                                | 127/527 (24.1%)          | 343/1584 (21.7%)                        | 101/856 (11.8%) | 204/1160 (17.6%)                            |
| Diagnosis                                           |                          |                                         |                 |                                             |
| - axSpA                                             | 51.3%                    | 60.3%                                   | 62.6%           | 64.4%                                       |
| - pSpA                                              | 6.5%                     | 6.1%                                    | 14.2%           | 12.4%                                       |
| - PsA                                               | 32.7%                    | 29.2%                                   | 16.9%           | 15.9%                                       |
| - ReA + IBD                                         | 4.6%                     | 2.4%                                    | 3.5%            | 5.4%                                        |
| - Juv-SpA + others                                  | 4.8%                     | 2.0%                                    | 2.9%            | 1.9%                                        |
| Symptom duration (years), mean (SD)                 | 15.3 (11.2)              | 17.5 (12.5)                             | 11.3 (9.8)      | 12.1 (9.6)                                  |
| Diagnosis delay (years), mean (SD)                  | 7.5 (9.2)                | 7.2 (9.6)                               | 5.3 (8.0)       | 5.7 (7.4)                                   |
| HLA-B27 positive                                    | 238/397 (59.9%)          | 818/1234 (66.3%)                        | 623/775 (80.4%) | 387/714 (54.2%)                             |
| First or second-degree relatives of SpA*            | 29.4%                    | 38.0%                                   | 29.5%           | 35.1%                                       |
| Axial involvement (according to the rheumatologist) | 66.4%                    | 75.7%                                   | 82.1%           | 78.6%                                       |
| Sacroiliitis on x-ray                               | 240/473 (50.7%)          | 857/1539 (55.7%)                        | 618/936 (66.0%) | 802/1212 (66.2%)                            |
| Uveitis ever                                        | 19.1%                    | 17.6%                                   | 17.6%           | 13.2%                                       |
| IBD ever (confirmed by endoscopy)                   | 5.4%                     | 6.1%                                    | 3.0%            | 7.8%                                        |
| Psoriasis ever (confirmed by a Dermatologist)       | 178/537 (33.1%)          | 31.4%                                   | 20.0%           | 16.7%                                       |
| csDMARDs ever                                       | 86.8%                    | 60.0%                                   | 74.7%           | 61.6%                                       |
| bDMARDs ever                                        | 52.6%                    | 67.4%                                   | 52.1%           | 56.9%                                       |
| Current csDMARDs                                    | 53.9%                    | 29.3%                                   | 44.8%           | 31.3%                                       |
| Current bDMARDs                                     | 33.5%                    | 56.2%                                   | 38.3%           | 46.4%                                       |
| NSAIDs alone                                        | 22.1%                    | 21.6%                                   | 24.2%           | 26.3%                                       |
| CRP mg/L, mean (SD)                                 | 22.7 (49.5)              | 6.9 (13.4)                              | 13.8 (28.5)     | 12.7 (23.1)                                 |
| CRP ≥6 mg/L                                         | 284/525 (54.1%)          | 540/1673 (32.3%)                        | 428/973 (44.0%) | 634/1265 (50.1%)                            |
| ASDAS-CRP, mean (SD)                                | 2.9 (1.3)                | 2.4 (1.1)                               | 2.4 (1.1)       | 2.6 (1.1)                                   |

|                                                                                       |                 |                  |                 |                  |
|---------------------------------------------------------------------------------------|-----------------|------------------|-----------------|------------------|
| <b>ASDAS-CRP &lt;1.3</b>                                                              | 60/523 (11.5%)  | 319/1642 (19.4%) | 178/973 (18.3%) | 164/1264 (13.0%) |
| <b>ASDAS-CRP &lt;2.1</b>                                                              | 155/523 (29.6%) | 711/1642 (43.3%) | 435/973 (44.7%) | 424/1264 (33.5%) |
| <b>PGA, mean (SD)</b>                                                                 | 4.6 (3.0)       | 4.2 (2.7)        | 4.0 (2.5)       | 4.7 (2.6)        |
| <b>BASDAI, mean (SD)</b>                                                              | 4.4 (2.8)       | 3.9 (2.4)        | 3.4 (2.3)       | 3.9 (2.3)        |
| <b>BASFI, mean (SD)</b>                                                               | 3.8 (3.0)       | 3.1 (2.6)        | 2.1 (2.4)       | 3.2 (2.6)        |
| <b>ASAS-HI, mean (SD)</b>                                                             | 7.3 (4.9)       | 6.5 (4.4)        | 6.2 (4.7)       | 6.7 (4.6)        |
| <b>PERIPHERAL MANIFESTATIONS</b>                                                      |                 |                  |                 |                  |
| <b>Peripheral joint disease in the past</b>                                           | 79.9%           | 52.8%            | 61.4%           | 49.2%            |
| <b>Peripheral joint disease in the past confirmed by specific investigations</b>      | 73.4%           | 48.1%            | 53.1%           | 45.1%            |
| <b>Root joints involvement in the past</b>                                            | 49.1%           | 17.5%            | 57.4%           | 30.3%            |
| <b>Mid foot arthritis (tarsitis) in the past</b>                                      | 23.6%           | 5.0%             | 9.1%            | 3.5%             |
| <b>Mid foot arthritis (tarsitis) in the past confirmed by specific investigations</b> | 4.1%            | 2.3%             | 2.8%            | 1.0%             |
| <b>Any enthesitis in the past</b>                                                     | 68.8%           | 37.1%            | 47.7%           | 41.3%            |
| <b>Any enthesitis in the past confirmed by specific investigations</b>                | 24.3%           | 16.7%            | 16.2%           | 15.5%            |
| <b>Dactylitis in the past</b>                                                         | 25.5%           | 14.2%            | 17.1%           | 11.2%            |
| <b>Number of current swollen joints, mean (SD)</b>                                    | 1.4 (3.0)       | 0.5 (1.8)        | 0.9 (2.8)       | 0.9 (4.6)        |
| <b>Any current swollen joint</b>                                                      | 189/536 (35.3%) | 269/1675 (16.1%) | 23.4%           | 19.8%            |
| <b>Number of current tender joints, mean (SD)</b>                                     | 4.2 (8.2)       | 1.8 (4.5)        | 2.2 (5.9)       | 2.9 (6.7)        |
| <b>Any current tender joint</b>                                                       | 328/536 (61.2%) | 604/1675 (36.1%) | 38.6%           | 54.0%            |
| <b>Current MEI score, mean (SD)</b>                                                   | 5.2 (9.9)       | 1.4 (4.2)        | 1.1 (3.8)       | 3.6 (6.8)        |
| <b>Number of current enthesitis according to the MEI†, mean (SD)</b>                  | 1.6 (3.6)       | 0.3 (1.4)        | 0.2 (1.3)       | 1.0 (2.2)        |
| <b>Any current enthesitis according to the MEI†</b>                                   | 175/536 (32.6%) | 182/1675 (10.9%) | 7.6%            | 28.2%            |
| <b>Any current enthesitis according to the SPARCC Enthesitis Index</b>                | 133/536 (24.8%) | 118/1675 (7.0%)  | 4.1%            | 14.0%            |
| <b>Any current enthesitis according to the LEI</b>                                    | 94/536 (17.5%)  | 88/1675 (5.2%)   | 2.9%            | 11.8%            |

All results are presented as mean (SD) and percentages for continuous and categorical variables, respectively.

\*First or second-degree relatives with Ankylosing Spondylitis, psoriasis, uveitis, reactive arthritis or inflammatory bowel disease.

†Enthesis with a score >1 according to the MEI.

ASAS-HI: ASAS Health Index; ASDAS-CRP: Ankylosing Spondylitis Disease Activity Score; AxSpA: axial Spondyloarthritis; BASDAI: Bath Ankylosing Disease Activity Index; BASFI: Bath Ankylosing Spondylitis Functional Index; bDMARDs: biological disease-modifying antirheumatic drugs; BMI: body mass index; CRP: C-reactive protein; csDMARDs: conventional synthetic disease-modifying antirheumatic drugs; FiRST: Fibromyalgia Rapid Screening Tool; IBD: Inflammatory Bowel Disease; IBD-SpA: Inflammatory Bowel Disease associated Spondyloarthritis; Juv-SpA: Juvenile Spondyloarthritis; PGA: Patient's Global Assessment; PsA: Psoriatic Arthritis; pSpA: peripheral Spondyloarthritis; ReA: Reactive Arthritis; SD: Standard Deviation; SPARCC Enthesitis Index

Supplementary Figure S1. Natural history of the enthesitis in the past with regard to the diagnosis\*.

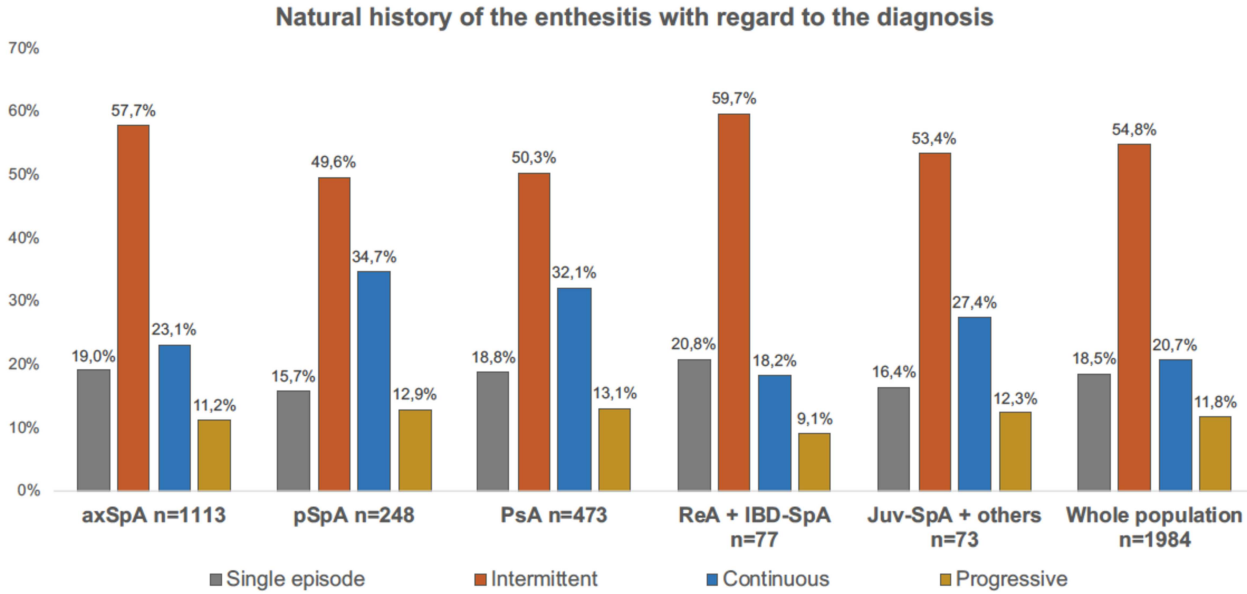

\*Among patients with enthesitis in the past (n = 1984).

AxSpA: axial Spondyloarthritis; IBD-SpA: Inflammatory Bowel Disease associated Spondyloarthritis; Juv-SpA: Juvenile Spondyloarthritis; PsA: Psoriatic Arthritis; pSpA: peripheral Spondyloarthritis; ReA: Reactive Arthritis.

Supplementary Figure S2. Number of locations of all episodes of enthesitis in the past with regard to the geographic area\*.

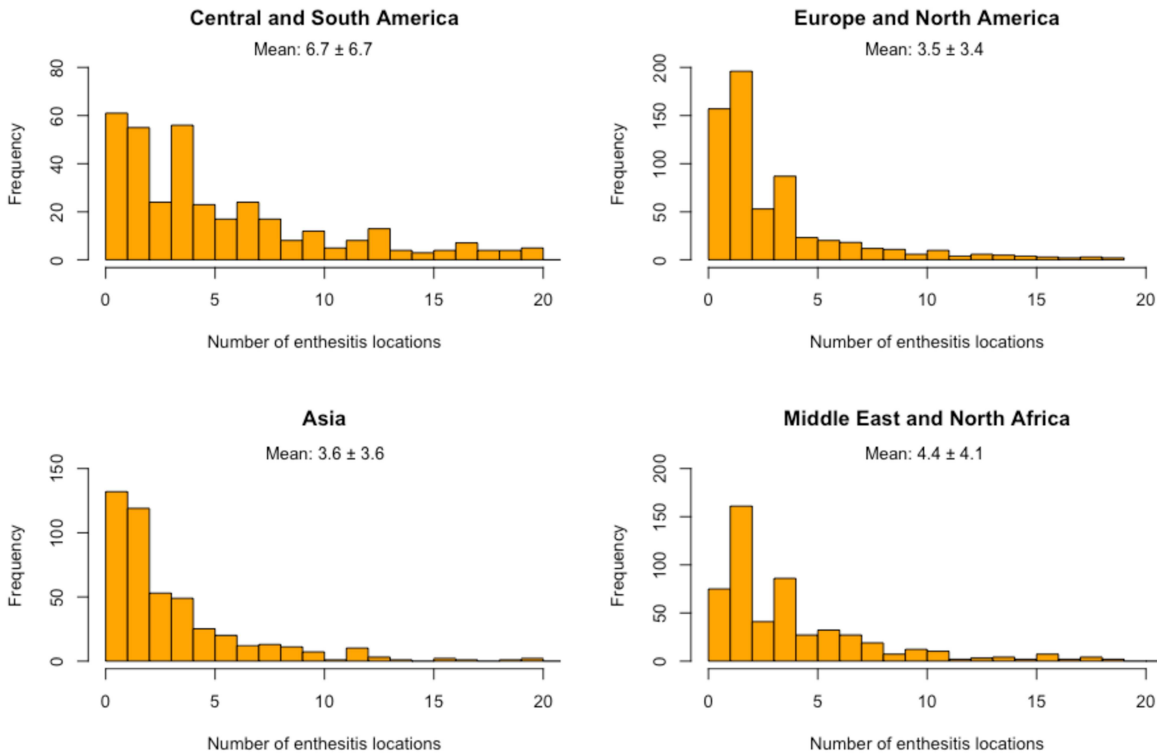

**Supplementary Figure S3. Number of locations of all episodes of enthesitis in the past with regard to the diagnosis\*.**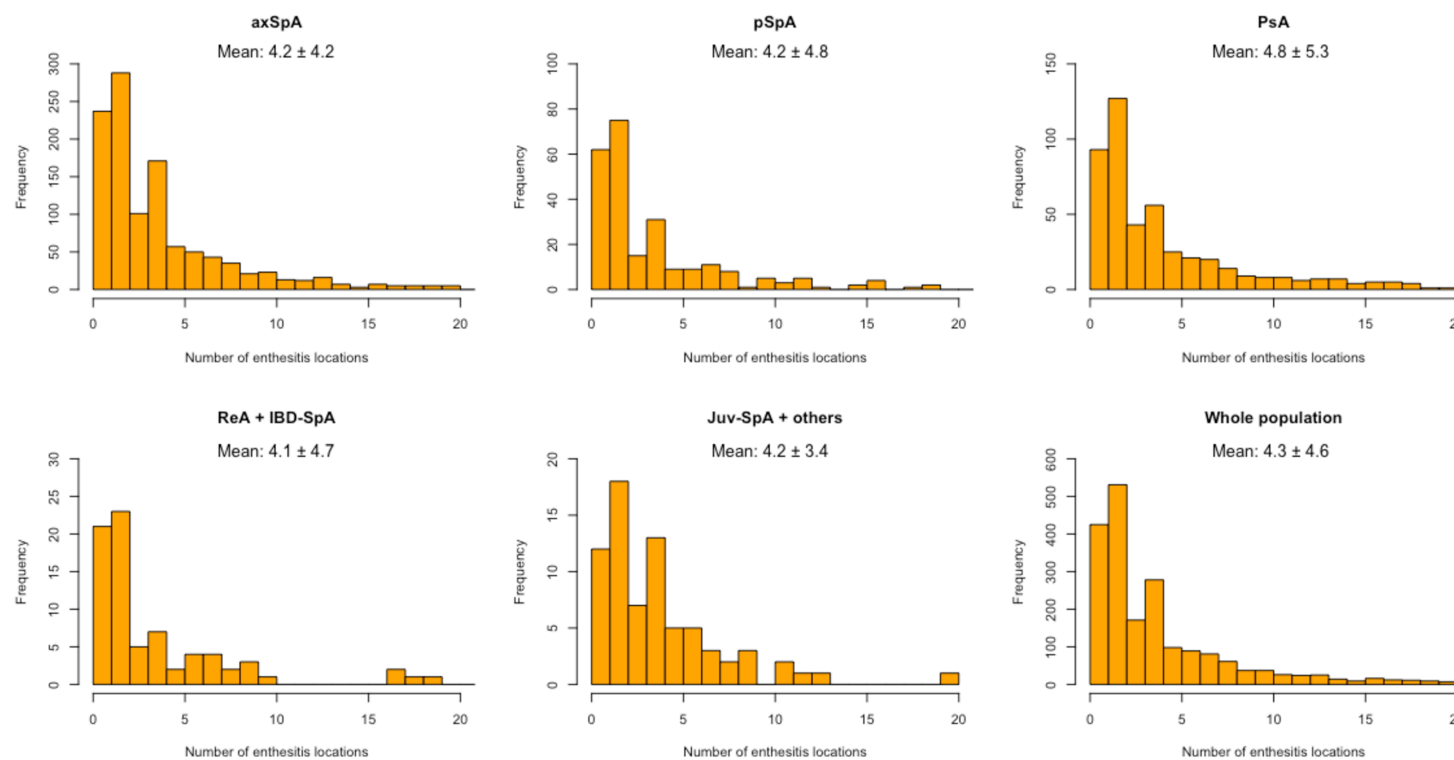

axSpA: axial Spondyloarthritis; IBD-SpA: Inflammatory Bowel Disease associated Spondyloarthritis; Juv-SpA: Juvenile Spondyloarthritis; PsA: Psoriatic Arthritis; pSpA: peripheral Spondyloarthritis; ReA: Reactive Arthritis.

Supplementary Figure S4. Location of the dactylitis in the past with regard to the diagnosis\*.

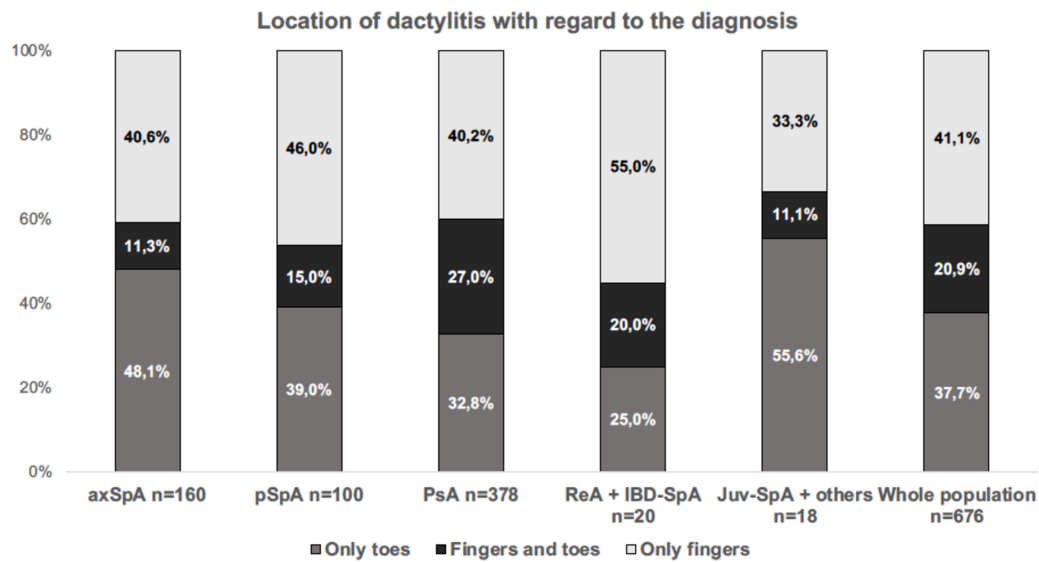

\*Among patients with dactylitis in the past and available data concerning the location (n = 676).  
AxSpA: axial Spondyloarthritis; IBD-SpA: Inflammatory Bowel Disease associated Spondyloarthritis; Juv-SpA: Juvenile Spondyloarthritis; PsA: Psoriatic Arthritis; pSpA: peripheral Spondyloarthritis; ReA: Reactive Arthritis.
